# Supplementary material
Source: ML conference proceedings conference paper supplement (https://openaccess.thecvf.com/content/WACV2023/html/Moghadam_A_Morphology_Focused_WACV_2023_paper.html)
Supplement: Supplementary file 1 [file Moghadam_A_Morphology_Focused_WACV_2023_supplemental.pdf]

## **Supplementary Material: A Morphology Focused Diffusion Probabilistic Model for Synthesis of Histopathology Images**

Puria Azadi Moghadam \*  
University of British Columbia  
puria.azadi@ubc.ca

Jochen Lennerz  
Harvard Medical School  
jlennerz@partners.org

Sanne Van Dalen \*  
Eindhoven University of Technology  
s.l.v.dalen@student.tue.nl

Stephen Yip  
BC Cancer Agency  
SYip-02@bccancer.bc.ca

Ali Bashashati  
University of British Columbia  
ali.bashashati@ubc.ca

Karina C. Martin  
BC Cancer Agency  
karina.chornenka@vch.ca

Hossein Farahani  
University of British Columbia  
h.farahani@ubc.ca

---

\*Equal Contribution

## 1. Supplementary Materials

This section provides additional information that we could not include in the paper itself because of space limitations.

### 1.1. Color Normalization in Detail

Let  $I_s \in \mathbb{R}^{m \times n_s}$  be the source image, and let  $I_t \in \mathbb{R}^{m \times n_t}$  be the target image, where  $m$  indicates the number of channels, and  $n_s$  and  $n_t$  are the number of pixels in the source and target images, respectively. Also,  $H \in \mathbb{R}^{r \times n}$  is the stain density map for  $r$  stains. The objective is to normalize the colors of the source images into similar color domain of the target, and find the transferred source image denoted as  $I_s^{norm}$ . Vahadane et al. [2] showed that for both  $I_s$  and  $I_t$ , we can estimate the normalized source patch ( $I_s^{norm}$ ) as:

$$\begin{aligned} H_s^{norm}(j, :) &= \frac{H_s(j, :)}{RM(H_s(j, :))} RM(H_t(j, :)), \quad j = 1, \dots, r, \\ V_s^{norm} &= W_t H_s^{norm}, \\ I_s^{norm} &= I_0 \exp(-V_s^{norm}), \end{aligned}$$

where  $RM$  denotes the robust maximum of a vector.

### 1.2. Forward Diffusion in Detail

This diffusion process  $q$  is a Markov chain and produces latents  $x_{1,g_m}$  through  $x_{T,g_m}$  as follows [1]:

$$q(x_{1,g_m}, \dots, x_{T,g_m} | x_{0,g_m}) = \prod_{t=1}^T q(x_{t,g_m} | x_{t-1,g_m}), \quad (1)$$

$$q(x_{t,g_m} | x_{t-1,g_m}) = \mathcal{N}\left(x_{t,g_m}; \left(\sqrt{1 - \beta_t}\right) x_{t-1,g_m}, \beta_t I\right), \quad (2)$$

and by using reparameterization, latent  $x_{t,g_m}$  can be derived directly from  $x_{0,g_m}$  as below:

$$x_{t,g_m} = \sqrt{\alpha_t} x_{0,g_m} + \sqrt{1 - \alpha_t} \varepsilon, \quad (3)$$

$0 < \beta_1, \beta_2, \dots, \beta_T < 1$  are fixed noise scales for each time step  $t$  and  $\alpha_t := \prod_{s=1}^t (1 - \beta_s)$ . Also, the distribution of the  $\varepsilon$  is as  $\varepsilon \sim \mathcal{N}(0, I)$

### 1.3. Model Implementation and Training

We trained our model using PyTorch with 1000 diffusion steps using a workstation with an NVIDIA V100 GPU. The rest of the parameters are available at Table 1.

| Parameter            | Value   |
|----------------------|---------|
| Image size           | 128     |
| Weighting scheme     | P2      |
| Diffusion steps      | 1000    |
| Maximum Patches      | 100     |
| Channels             | 64      |
| Heads                | 4       |
| Heads channels       | 64      |
| Attention resolution | 32,16,8 |
| BigGAN up/downsample | yes     |
| Num Resblocks        | 2       |
| Learning rate        | 1e-4    |

Table 1: Hyperparameters for diffusion models used in this paper.

#### 1.4. Samples of Real Patches

Table 2 provides the breakdown of the extracted patches based on genomic subtypes and Figure 1 shows samples of real extracted patches after applying the the color normalization module to them.

|              | IDHC       | IDHNC    | IDHWT    | Total  |
|--------------|------------|----------|----------|--------|
| Patches      | 12,139     | 16,975   | 4,663    | 33,777 |
| IDH Status   | Mutant     | Mutant   | Wildtype | -      |
| 1p19q Status | Codeletion | Retained | -        | -      |

Table 2: Breakdown of extracted patches per subtype

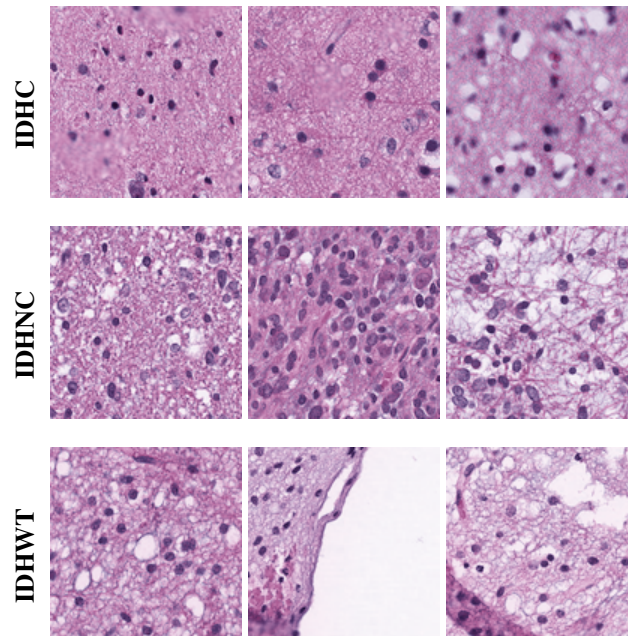

Figure 1: Selection of patches with size =128x128 pixels extracted from the WSI. Each row represents a different genotypes.

#### 1.5. Samples of Generated Images by Our Diffusion Probabilistic Model

Figure 2 presents the 10 synthetic images produced by diffusion model, which are significantly close to real images.

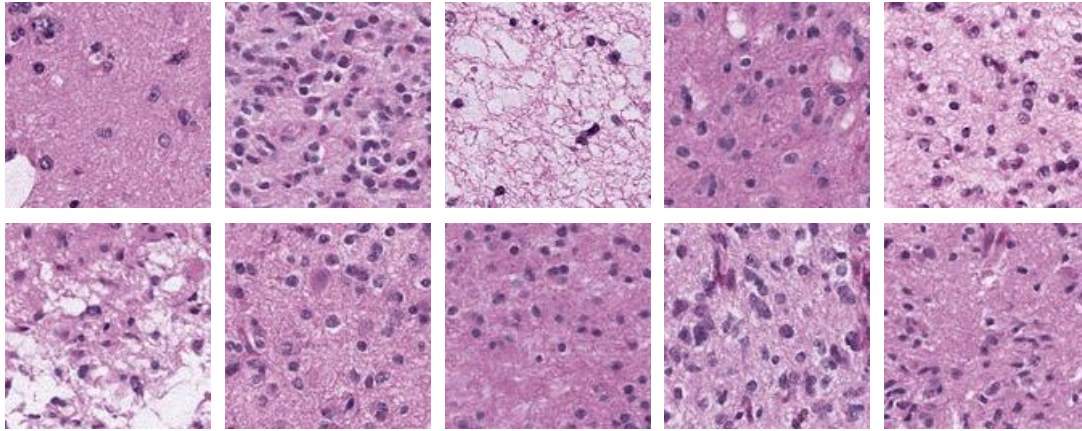

Figure 2: Top 10 generated images by our diffusion model.

### 1.6. Survey Visualization

Figure 3 shows a sample section of the web-form that the pathologists completed. Figure 4 is the detailed illustration of each expert opinion about each real or synthetic image. Green and yellow colours depict synthetic and real images, respectively. Also, brown presents a synthetic images that classified as real by pathologists and red corresponds to a real images identified as synthetic. Purple shows medium confidence answers.

Image 5/80

Image #5

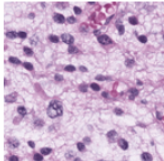

Real vs Synthetic? \*

Real

Synthetic

How much confident are you about your previous answer? \*

High

Medium

Figure 3: The web form for subjective study

## References

- [1] Jonathan Ho, Ajay Jain, and Pieter Abbeel. Denoising diffusion probabilistic models. *Advances in Neural Information Processing Systems*, 33:6840–6851, 2020.
- [2] Abhishek Vahadane, Tingying Peng, Amit Sethi, Shadi Albarqouni, Lichao Wang, Maximilian Baust, Katja Steiger, Anna Melissa Schlitter, Irene Esposito, and Nassir Navab. Structure-preserving color normalization and sparse stain separation for histological images. *IEEE Transactions on Medical Imaging*, 35(8):1962–1971, 2016.

| Image Number | Label     | P1        |        | P2        |        |
|--------------|-----------|-----------|--------|-----------|--------|
| 1            | Synthetic | Real      | High   | Synthetic | High   |
| 2            | Synthetic | Real      | High   | Real      | High   |
| 3            | Real      | Real      | High   | Real      | High   |
| 4            | Synthetic | Synthetic | Medium | Real      | Medium |
| 5            | Real      | Real      | High   | Synthetic | Medium |
| 6            | Synthetic | Synthetic | High   | Synthetic | Medium |
| 7            | Synthetic | Real      | High   | Real      | Medium |
| 8            | Synthetic | Real      | High   | Synthetic | Medium |
| 9            | Real      | Real      | High   | Synthetic | Medium |
| 10           | Synthetic | Real      | High   | Real      | Medium |
| 11           | Real      | Real      | High   | Synthetic | High   |
| 12           | Real      | Real      | High   | Real      | High   |
| 13           | Real      | Real      | High   | Synthetic | High   |
| 14           | Synthetic | Synthetic | Medium | Synthetic | Medium |
| 15           | Real      | Real      | High   | Real      | High   |
| 16           | Synthetic | Real      | High   | Synthetic | Medium |
| 17           | Synthetic | Real      | High   | Real      | Medium |
| 18           | Synthetic | Real      | High   | Real      | Medium |
| 19           | Real      | Real      | High   | Real      | High   |
| 20           | Real      | Real      | High   | Synthetic | High   |
| 21           | Synthetic | Synthetic | High   | Synthetic | High   |
| 22           | Real      | Real      | High   | Real      | High   |
| 23           | Synthetic | Real      | High   | Synthetic | High   |
| 24           | Synthetic | Real      | High   | Synthetic | Medium |
| 25           | Real      | Real      | High   | Real      | Medium |
| 26           | Real      | Real      | High   | Synthetic | Medium |
| 27           | Real      | Real      | High   | Real      | Medium |
| 28           | Real      | Real      | High   | Real      | Medium |
| 29           | Real      | Real      | High   | Synthetic | High   |
| 30           | Real      | Synthetic | Medium | Real      | Medium |
| 31           | Synthetic | Real      | High   | Synthetic | Medium |
| 32           | Real      | Real      | High   | Real      | High   |
| 33           | Synthetic | Real      | Medium | Real      | High   |
| 34           | Real      | Real      | High   | Synthetic | Medium |
| 35           | Synthetic | Real      | High   | Synthetic | High   |
| 36           | Synthetic | Real      | High   | Synthetic | High   |
| 37           | Real      | Real      | High   | Synthetic | High   |
| 38           | Synthetic | Real      | High   | Real      | High   |
| 39           | Real      | Synthetic | Medium | Synthetic | Medium |
| 40           | Real      | Real      | Medium | Synthetic | High   |
| 41           | Synthetic | Real      | High   | Real      | Medium |
| 42           | Synthetic | Real      | High   | Real      | High   |
| 43           | Synthetic | Real      | High   | Real      | High   |
| 44           | Real      | Synthetic | Medium | Real      | Medium |
| 45           | Synthetic | Real      | High   | Real      | High   |
| 46           | Synthetic | Real      | High   | Real      | High   |
| 47           | Real      | Synthetic | Medium | Synthetic | Medium |
| 48           | Real      | Real      | High   | Real      | High   |
| 49           | Synthetic | Real      | High   | Real      | High   |
| 50           | Synthetic | Synthetic | Medium | Synthetic | High   |
| 51           | Real      | Real      | High   | Synthetic | High   |
| 52           | Synthetic | Real      | High   | Synthetic | High   |
| 53           | Real      | Synthetic | Medium | Synthetic | High   |
| 54           | Synthetic | Real      | High   | Real      | Medium |
| 55           | Real      | Synthetic | Medium | Synthetic | High   |
| 56           | Real      | Synthetic | High   | Synthetic | High   |
| 57           | Real      | Real      | High   | Synthetic | Medium |
| 58           | Synthetic | Real      | High   | Real      | Medium |
| 59           | Real      | Real      | High   | Real      | Medium |
| 60           | Real      | Real      | High   | Real      | High   |
| 61           | Synthetic | Real      | High   | Real      | High   |
| 62           | Real      | Real      | High   | Synthetic | High   |
| 63           | Synthetic | Real      | High   | Real      | High   |
| 64           | Real      | Real      | High   | Real      | Medium |
| 65           | Real      | Real      | High   | Real      | Medium |
| 66           | Real      | Real      | High   | Synthetic | High   |
| 67           | Synthetic | Synthetic | Medium | Real      | High   |
| 68           | Synthetic | Real      | High   | Real      | High   |
| 69           | Synthetic | Real      | High   | Real      | High   |
| 70           | Real      | Synthetic | Medium | Synthetic | High   |
| 71           | Real      | Real      | High   | Real      | High   |
| 72           | Synthetic | Synthetic | Medium | Synthetic | High   |
| 73           | Real      | Real      | Medium | Synthetic | Medium |
| 74           | Real      | Real      | High   | Synthetic | Medium |
| 75           | Synthetic | Real      | Medium | Synthetic | Medium |
| 76           | Real      | Real      | High   | Synthetic | Medium |
| 77           | Synthetic | Real      | High   | Synthetic | Medium |
| 78           | Synthetic | Real      | High   | Synthetic | High   |
| 79           | Synthetic | Real      | High   | Real      | Medium |
| 80           | Synthetic | Real      | High   | Real      | Medium |

Figure 4: Illustration of each pathologist’s opinion. Green: synthetic image, yellow: real one. Brown: synthetic images that classified as real by pathologists. Red: real image diagnosed as synthetic image. Purple: medium confident answers.
